# Supplementary material for: Plasma Proteomics Unveil Novel Immune Signatures and Biomarkers upon SARS-CoV-2 Infection
Source: Int J Mol Sci. 2023 Mar 27;24(7):6276. doi: 10.3390/ijms24076276 (PMC10093853; doi:10.3390/ijms24076276)
Supplement: Supplementary file 1 [file ijms-24-06276-s001.zip › ijms-2216868-supplementary/Supplementary tables.xlsx]

## Sheet: Table S1
Table S1: List of DEPs between patients with comorbidities and corresponding healthy controls with the fold change expressed as patients with comorbidities—healthy controls (CP-HC)
Protein	logFC(CP-HC)	adj.p.value
ENAH	0.445737	0.0453341
IL15RA	0.343801	0.0137165
FCRL3	0.274816	0.0350823
IL3RA	0.269319	0.0425489
PARP1	0.673879	0.0378614
TRAF2	-0.7464	0.00184885
TRIM5	-0.667816	0.0137342
IKBKG	-0.665421	0.0103717
CCL26	0.708179	0.00799614
CD83	0.471632	0.00344443
LY75	0.367537	0.0415964
CD4	0.327589	0.022759
NTF3	0.437379	0.00140421
CD200R1	0.393163	0.00186019
TGFA	0.363816	0.0120112
CKAP4	0.439853	0.0082109
CD79B	0.664258	0.0261482
CLEC7A	0.418111	0.0303628
PPP1R9B	-0.426958	0.0331846
HGF	0.520974	0.0127845
CD276	0.542426	0.0485958
CCL21	0.684421	0.0194421
SIGLEC1	0.616679	0.0222799
CD48	0.457474	0.00974434
LY6D	0.390137	0.0198929
MGLL	-0.519889	0.0277347
ANGPTL2	0.503016	0.0381353
AGER	0.383768	0.0335675
SPON1	0.470347	0.0454968
PLAUR	0.364789	0.0227761
MATN2	0.449253	0.00695648
LTBR	0.348379	0.0157978
LGALS9	0.627984	0.00955667
AGRN	0.736689	0.000632875
GZMH	0.657926	0.039075
ENTPD6	0.241305	0.0487245
ENTPD5	0.194726	0.0422447
ACE2	0.534658	0.0486812
SDC1	0.612774	0.0359379
NPDC1	0.316337	0.0461064
COL4A1	0.486832	0.0264894
LILRA5	0.290995	0.0495012
CCDC80	0.489589	0.0415039
IGFBP7	0.486163	0.0160195
CES1	1.14869	0.0128795
PLAT	0.645432	0.0434063
VWF	0.880995	0.0107394
TNFSF13B	0.5115	0.00398474
COL6A3	0.575226	0.0287179
PTPRS	0.306289	0.0311088
GAS6	0.312979	0.0157268
LILRB1	0.278584	0.0128576
TNC	0.448911	0.0162893
C1QTNF1	0.507063	0.0411085
THBS4	0.706716	0.0109963
DRAXIN	0.429732	0.0484691
EFNA4	0.549426	0.00158809
SETMAR	0.451621	0.000633184
MDGA1	0.611716	0.0487254
TNFRSF6B	0.825242	0.0223384
TNFRSF10A	0.437626	0.0260976
SNCG	0.609984	0.0277076
HNMT	0.7404	0.0285983
ROBO2	0.348637	0.0136524
PVR	0.433684	0.0294282
EZR	0.305685	0.0223986
BST2	0.954821	0.0268869
CD74	0.463584	0.0366599
GOLM2	0.401753	0.00583781
TNFRSF8	0.639063	0.0033495
THY1	0.458626	0.00917008
CTSS	0.285695	0.0223706
SCARA5	0.479553	0.0226075
FOLR2	0.492595	0.00145881
MSR1	0.569716	0.0448861
CLEC14A	0.4066	0.0269631
THBS2	0.418779	0.0452996
PILRA	0.583663	0.0269697
HAVCR2	0.509353	0.00086462
RELT	0.330237	0.0436754
VSIG4	0.552168	0.036386
TNFRSF1B	0.668142	0.0337877
TNFRSF1A	0.346937	0.0457148
GRN	0.500147	7.10415e-05
RRM2	0.679011	0.0483332
SH2B3	-0.814205	0.0148013
CLEC6A	0.507489	0.0288879
CD28	0.3409	0.017193
RRM2B	-0.511005	0.021991
RNF41	-0.783737	0.00476925
LTBP3	0.8264	0.00775021
ARHGAP1	-0.343232	0.02646
ADAMTS15	0.489558	0.0470528
DPEP2	0.336447	0.00539108
TAFA5	0.479642	0.0183977
LRRC25	0.573321	0.00605143
EPHA2	0.524863	0.0207194
AREG	0.685447	0.0211465
RBP2	0.697126	0.0336846
RBP5	0.750247	0.0318041
PDCD1	0.565295	0.00483919
EPS8L2	0.450626	0.00810532
FGF21	1.45559	0.0288798
CD300E	0.629137	0.0145277
VWA1	0.541274	0.00957085
SCLY	0.596368	0.0386385
CCN4	0.381821	0.0379751
LTA4H	0.510803	0.0263352
GFRA1	0.653863	0.000898019
SMOC1	0.669242	0.0114599
ADM	0.387447	0.0157802
PLA2G15	0.318932	0.0367027
TJAP1	-0.575811	0.0434161
NT5E	0.705563	0.0244536
FURIN	0.452558	0.0279078
ERBB2	0.345389	0.0139187

## Sheet: Table S2
Table S2: List of DEPs identified as secreted proteins in human blood in the Human Protein Atlas
Secreted proteins
ACE2
ADA2
ADM
ANGPT2
ANGPTL2
C1QTNF1
CCL11
CCL14
CCL2
CCL21
CCL26
CCN3
CD55
CHI3L1
CXCL16
CXCL8
EFNA4
ENTPD5
ENTPD6
FAM3B
FAP
FGF21
FOLR2
GAS6
GDF2
GRN
GZMH
HGF
IGFBP4
IGFBP7
IGFBPL1
IL15RA
IL17A
IL17C
IL19
IL32
IL6ST
LGALS9
LHB
LILRA5
LTBP3
NELL2
PI3
PILRA
PLAT
PLTP
PRTN3
PTK7
PTN
SDC1
SPON1
SPON2
TGFA
TGFB1
TNFRSF1A
TNFRSF1B
TNFRSF6B
TNFSF13B
VWF

## Sheet: Table S3
Table S3: List of DEPs between patients with comorbidities and disease controls with the fold change expressed as patients with comorbidities—disease controls (CP-DC)
Protein	logFC(CP-DC)	adj.p.value
IL17A	-0.287429	0.0136374
TRAF2	-0.588425	0.00801453
CCL26	0.686874	0.00799614
CD83	0.319192	0.0334529
NTF3	0.312202	0.0141723
CD200R1	0.245213	0.0384851
CDSN	0.400288	0.0216229
CD48	0.483809	0.00974434
LY6D	0.373263	0.0198929
ANGPTL2	0.434845	0.0421766
LAIR1	0.468308	0.00828412
AGER	0.465269	0.0167114
CHRDL1	0.410272	0.0492773
LGALS9	0.47665	0.0318929
AGRN	0.51567	0.0101683
PTN	0.935859	0.0245162
TGM2	0.465588	0.0456016
NPDC1	0.324568	0.0461064
ICAM2	0.286724	0.047166
VWF	0.648202	0.0409162
EFNA4	0.357115	0.0280311
TMPRSS5	0.451424	0.0108832
MDGA1	0.658928	0.0487254
GOLM2	0.330682	0.0133311
FOLR2	0.347836	0.0156438
HAVCR2	0.286742	0.0471474
RELT	0.297095	0.0436754
TNFRSF1B	0.580364	0.0372495
GRN	0.330784	0.00465909
CD28	0.398158	0.00929737
ATP6AP2	0.292523	0.0392996
CA11	0.390193	0.0115278
KLK12	0.608902	0.0314925
DPEP2	0.256401	0.0213098
TAFA5	0.41641	0.0227804
LRRC25	0.421833	0.0285642
RBP2	0.769769	0.0334545
SIGLEC9	0.281667	0.0113724
FGF21	1.36188	0.0288798
GALNT2	0.25611	0.0318866
GFRA1	0.419155	0.0227601
HAGH	0.581546	0.00769696
SMOC1	0.509552	0.0353137
XPNPEP2	1.08377	0.0414557

## Sheet: Table S4
Table S4: List of DEPs between patients without comorbidities and their healthy controls with the fold change expressed as patients without comorbidities—healthy controls (CP-DC)
Protein	logFC(NP-HC)	adj.p.value
TDGF1	-1.77799	0.0196842
ANGPT2	-1.1203	0.0356844
LHB	-0.900978	0.0482517
NTproBNP	-0.876878	0.0395562
RAB37	-0.863744	0.0456364
IL17C	-0.786111	0.0337788
RNF41	-0.764711	0.0155977
AMFR	-0.741944	0.0229818
SESTD1	-0.686059	0.032972
MPHOSPH8	-0.545779	0.0144957
PSRC1	-0.455722	0.0094428
PRTN3	-0.416233	0.0467293
FCAR	-0.412856	0.0323474
ITGB1BP1	-0.394301	0.0470508
CXCL16	0.2728	0.0144649
MARCO	0.333889	0.0480774
ACP5	0.384878	0.0193664
MEGF10	0.402756	0.0335447
FAM3B	0.441978	0.00181052
CHGB	0.473833	0.047563
MUC13	0.557411	0.0256863

## Sheet: Table S5
Table S5: List of DEPs between patients with early collection of sample after SARS-CoV-2 infection and late collection with the fold change expressed as early–late (E-L)
Protein	logFC(E-L)	adj.p.value
IL19	-1.24394	0.00825779
ANXA10	-1.17104	0.0322527
CLC	-1.15396	0.0331586
CHI3L1	-1.07982	0.0283613
EDA2R	-0.933124	0.0144986
CCN3	-0.92804	0.0247113
PI3	-0.847518	0.0391429
SCARF2	-0.775505	0.0180639
CCL2	-0.730042	0.0135912
CXCL8	-0.684577	0.0190508
CGREF1	-0.683914	0.00787888
MILR1	-0.682979	0.0356342
CCL11	-0.677621	0.0299849
CNTN5	-0.676511	0.00273574
GDNF	-0.672527	0.0172844
CDH6	-0.660488	0.00947243
PRSS27	-0.658398	0.000923566
WFDC2	-0.636326	0.0268701
FAM3C	-0.623466	0.00374252
ADA2	-0.617335	0.0278623
SCARA5	-0.612357	0.0115304
DRAXIN	-0.611833	0.0352191
IGFBPL1	-0.603542	0.0147585
ANGPTL7	-0.590663	0.0226737
CCN4	-0.579145	0.0153945
NOTCH3	-0.5767	0.0461939
PLTP	-0.57456	0.0179087
FCRL2	-0.564897	0.0175869
IL32	-0.558289	0.0155848
ITGB7	-0.556277	0.0469582
ROR1	-0.529669	0.0323257
ADAM23	-0.518061	0.0297339
TGFB1	-0.516817	0.0380418
CDH3	-0.515769	0.0067966
GPR37	-0.509002	0.0484376
LY6D	-0.50056	0.0320221
DPT	-0.498616	0.0413882
GFRA3	-0.497591	0.0260571
ACAN	-0.492398	0.0107141
GDF2	-0.489527	0.0254758
SPINK5	-0.486604	0.0481987
GPNMB	-0.48555	0.00722902
NTRK2	-0.465223	0.00331531
CCL14	-0.464745	0.0448706
NBL1	-0.453774	0.0285224
NFASC	-0.448397	0.0444845
CLSTN1	-0.443001	0.0335829
FAP	-0.442282	0.0445174
L1CAM	-0.433182	0.0116919
BTN2A1	-0.43278	0.0183738
CNTN1	-0.432628	0.0194994
MATN2	-0.425512	0.0463167
ATP6V1F	-0.415031	0.0437554
NELL2	-0.40444	0.039527
CA12	-0.397889	0.0335408
CD55	-0.396617	0.0114809
NPTX1	-0.373391	0.0404114
SMARCA2	-0.3721	0.0283334
ECE1	-0.356037	0.0225462
RARRES1	-0.341239	0.0118348
CD164	-0.330701	0.0223597
GKN1	-0.309191	0.0140011
IL6ST	-0.285683	0.0226766
PTK7	-0.27813	0.0425855
ICAM2	-0.247968	0.0237311
CNTN4	-0.237327	0.0144731
SIGLEC9	-0.217443	0.0424985
FCAR	0.378957	0.0419613

## Sheet: Table S6
Table S6: List of DEPs between patients with antibody generation against SARS-CoV-2 and without antibody generation with the fold change expressed as antibody generation–non-antibody generation (Ab+-Ab−)
Protein	logFC(Ab+-Ab-)	adj.p.value
ADAMTS15	-1.00947	0.0261594
ADM	-0.426381	0.0421621
ATP6V1F	0.355112	0.0437554
CCL14	-0.38663	0.0448706
CCN3	-0.740366	0.0310194
CDH3	-0.322689	0.041056
CGREF1	-0.436672	0.0407981
CNTN4	0.174198	0.0312927
COL9A1	-0.853369	0.0297727
DCXR	0.716244	0.0133517
FABP6	-0.641645	0.00810998
FBP1	0.953999	0.0295015
GPR37	-0.7927	0.00429293
IGFBP4	-0.834066	0.0313706
IGFBPL1	-0.409568	0.0455937
IL17C	-0.778834	0.0122899
ISM1	-0.812224	0.0334143
LY6D	-0.439188	0.0320221
MUC16	-0.604121	0.00734715
PTK7	-0.245676	0.0425855
SPINK6	-0.646222	0.0423019
SPON2	-0.668357	0.0216896
THY1	-0.580645	0.00439799

## Sheet: Table S7
Table S7: List of major comorbidities, BMI and medications of the major comorbidities of patients with COVID-19
Case	Comorbidity (ICD-10 code)	BMI	Medication related with the major comorbidity (ATC code)
1	-
2	-	27.7778
3	-
4	D472	20.8323	no specific treatment
5	-	25.7812
6	J451	25.4432	H02AB04; R03AC02; R03BA08; R03BB01
7	E7801; E785; I10	35.8408	C08CA01; C09AA02; C10AA05; B01AB05
8	G35	35.3212	L04AA06
10	M058		H02AB06; L04AA24
11	E119; E6601; E7801; I10	37.2428	B01AB10
12	J341	25.8291	no specific medication
13	M084		L04AB01
14	I639; J069
16	C1871; J189	26.6574	B01AB10; L01BC06; A02AA04; A02BC02; H02AB02
17	K573; I10; I269	48.7346	B01AB10; A02BC02; A10AB05; C08CA01; C09AA04; C10AA05; R03AL01
18	-
19	-
20	E101; E103	26.9188	no specific medication
21	L405; M073	25.5923	no specific medication
22	-	21.3839
25	-	22.8057
26	A415	24.0163	J01CR02; J01CR05; J01DC02
27	K573	30.3642	no specific medication
28	E050	28.257	H03BB01
29	E118; E119; I10; I251	30.7632	A10AB05; A10AE04; A10BA02; A10BD20; C07AB07; C09CA03
30	J459	30.4688	H02AB06; R01AD12; R01AD58
31	J440; I10		R03AC02; R03AL01; B01AB10; C08CA01
32	-	27.5482
